# Supplementary figures and images for: Environmental changes in oxygen tension reveal ROS-dependent neurogenesis and regeneration in the adult newt brain
Source: eLife journal article supplement (doi:10.7554/elife.08422), 2015-10-20

Figure 4 - Figure supplement 1

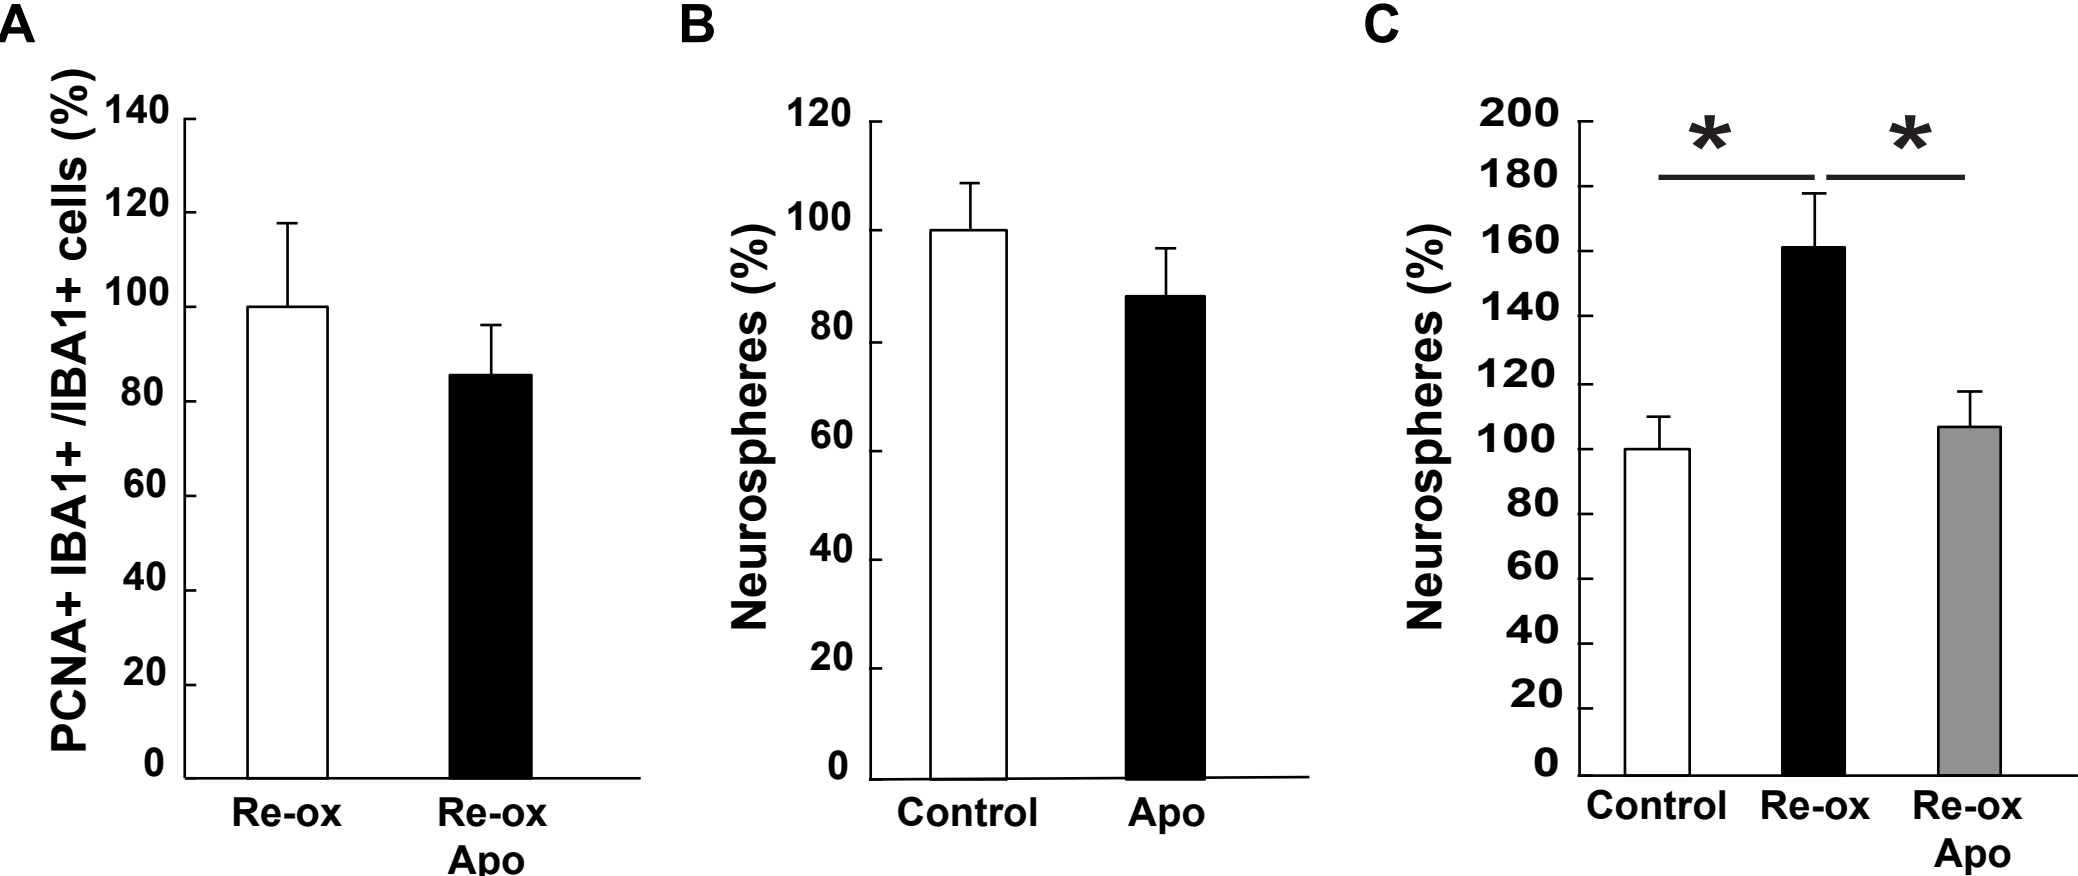

Supplement: supp [file elife-08422-supp-v1.zip]

Figure 2 - Figure Supplement 1

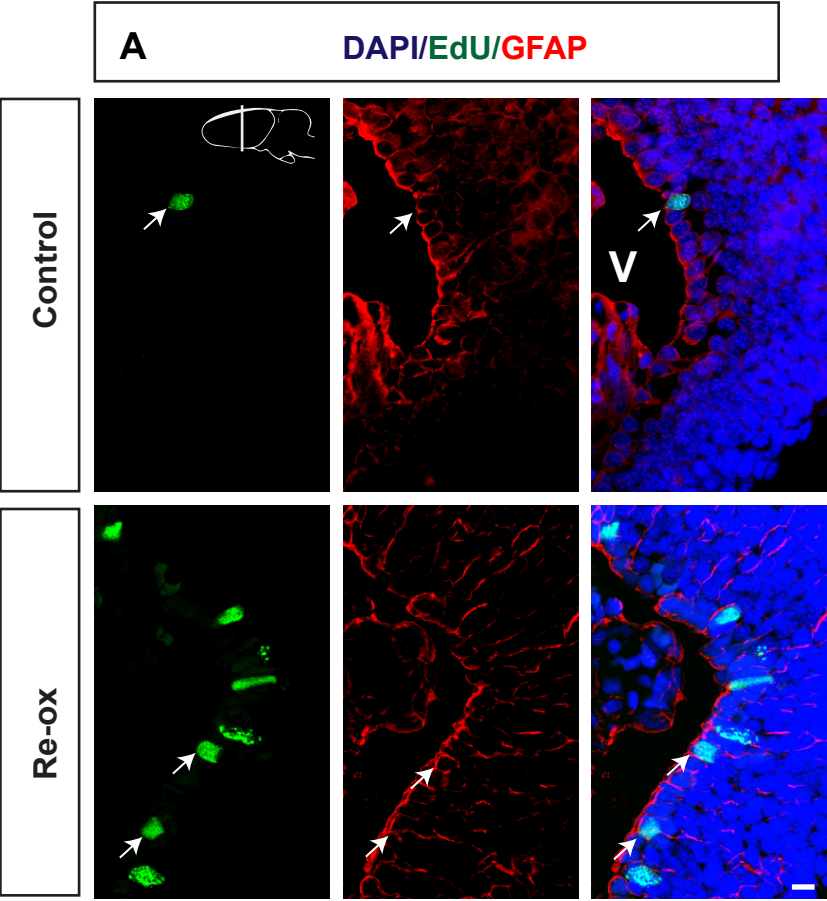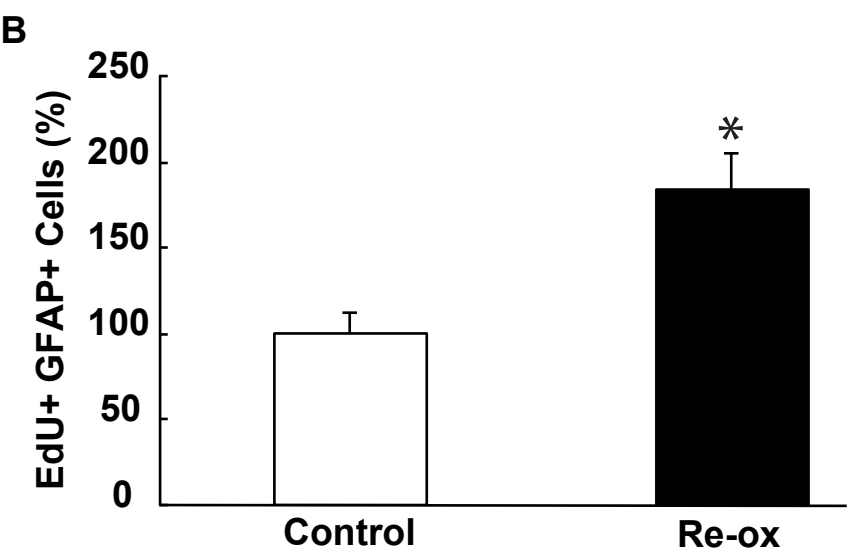

Supplement: supp [file elife-08422-supp-v1.zip]

Figure 1- Figure Supplement 1

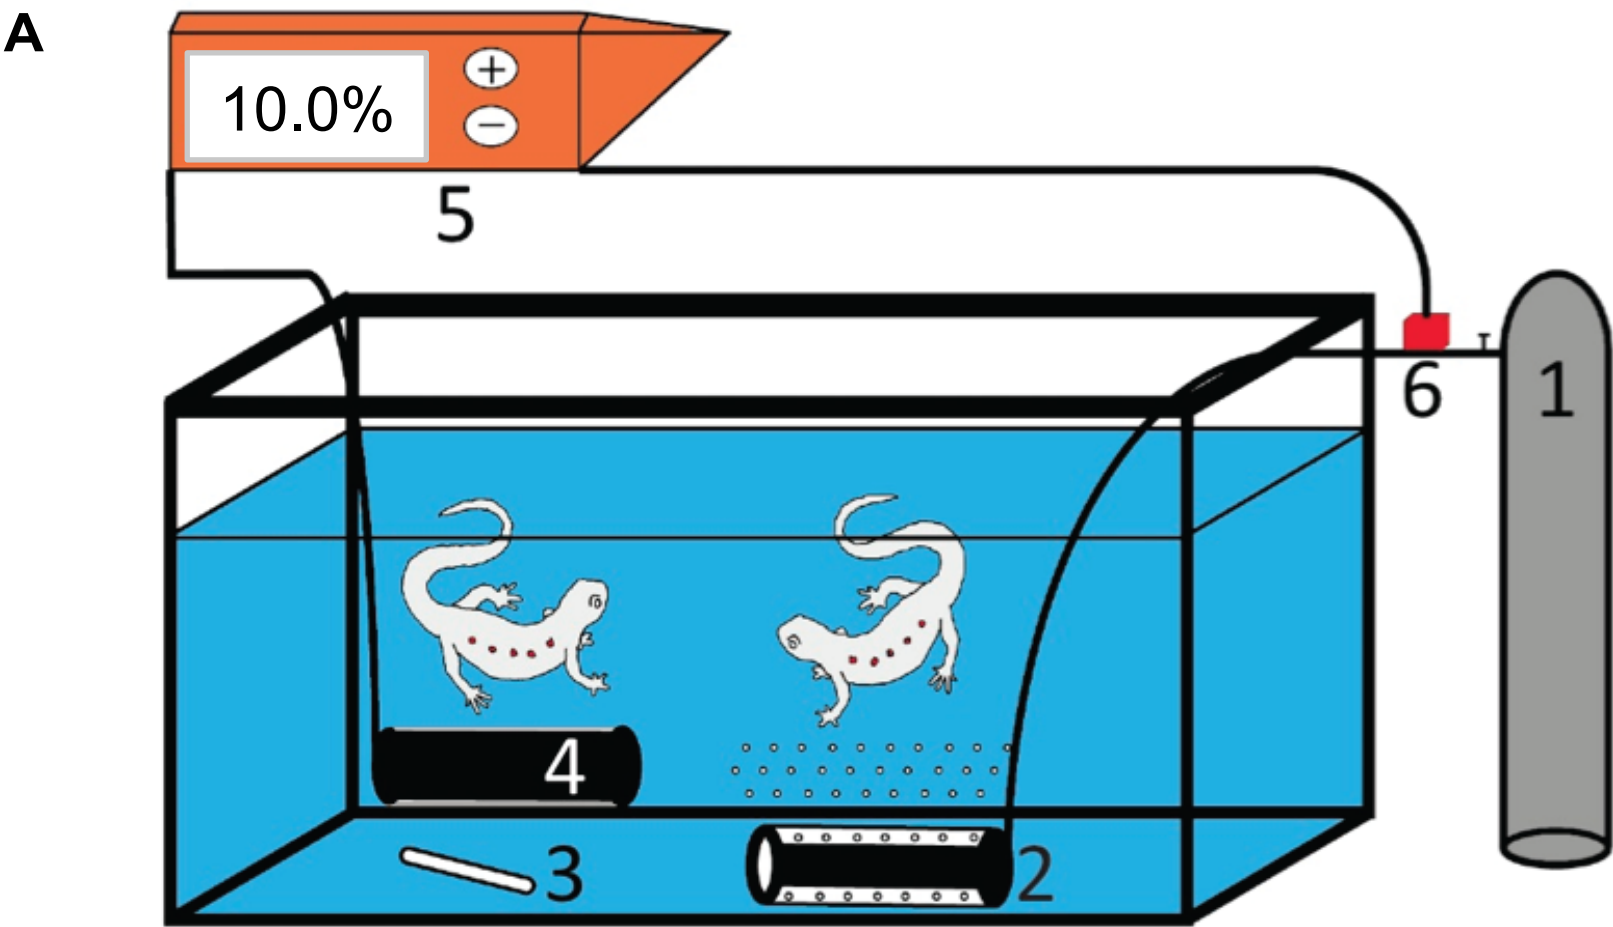

**B** Oxygen tension

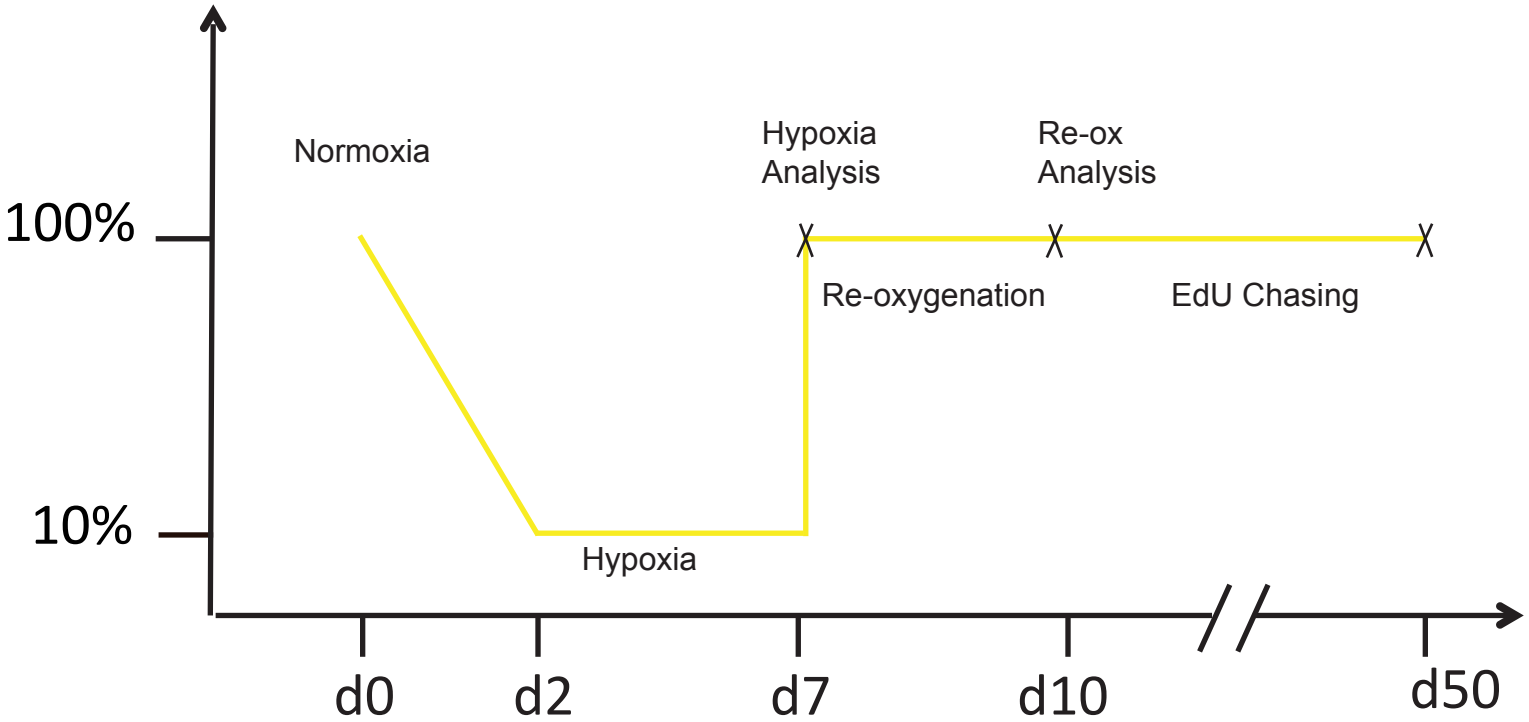

Supplement: supp [file elife-08422-supp-v1.zip]

# Figure 3 - Figure supplement 1

**A**

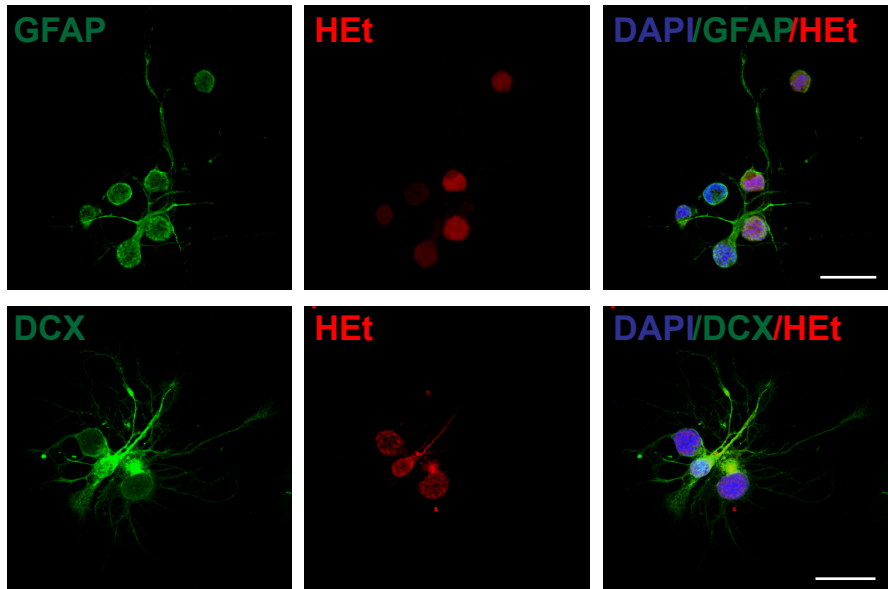

**B**

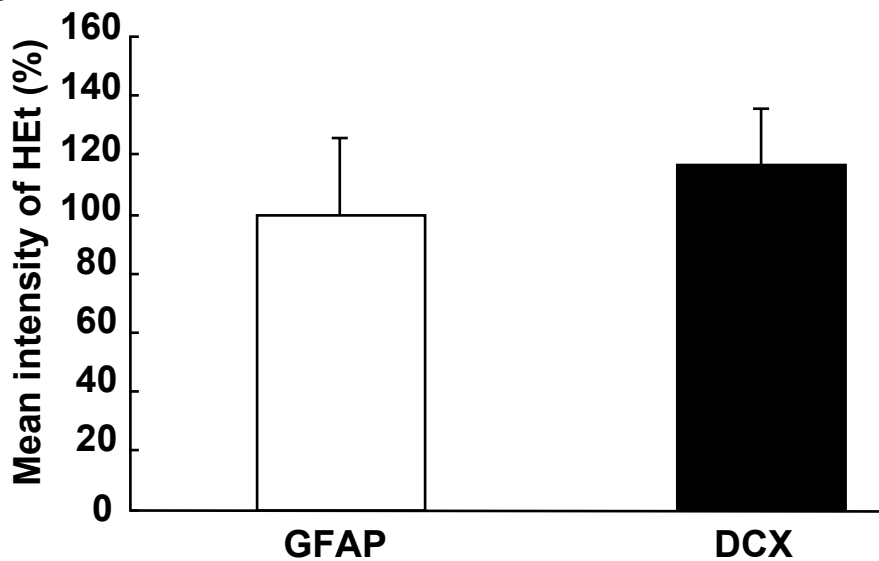

Supplement: supp [file elife-08422-supp-v1.zip]
